# Supplementary material for: Comparative genomic analyses highlight the contribution of pseudogenized protein-coding genes to human lincRNAs
Source: PubMed Central journal article supplement (PMC5644071; doi:10.1186/s12864-017-4156-x), 2017-10-16

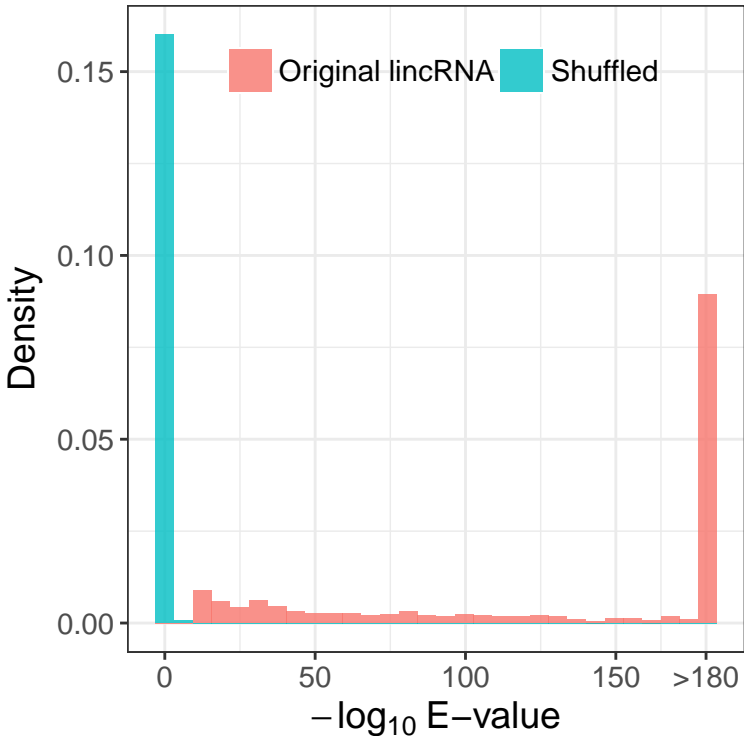

Supplement: 12864_2017_4156_MOESM2_ESM.pdf [file 12864_2017_4156_MOESM2_ESM.pdf]
